# Supplementary material
Source: PubMed Central journal article supplement (PMC2709336)
Supplement: supp_M109.005660_SupplFig1.pdf [file supp_M109.005660_SupplFig1.pdf]

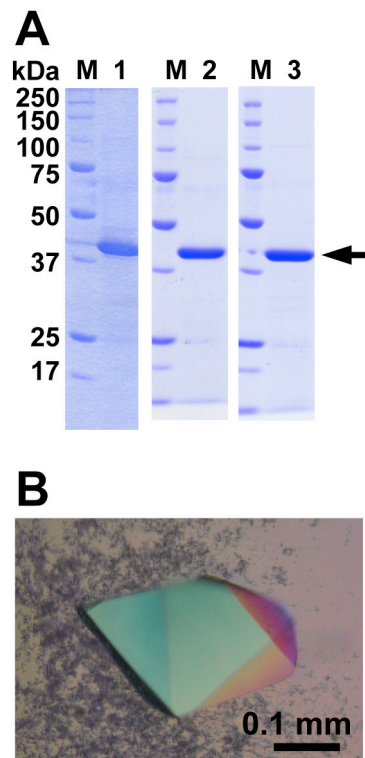

Supplementary Fig. 1. Purification and crystallization of streptococcal UGLs. *A.* SDS-PAGE profile. Lane M, molecular weight standards (from top): synthetic polypeptides with molecular weights of 250,000, 150,000, 100,000, 75,000, 50,000, 35,000, 25,000, and 17,000; lane 1, SagUGL; lane 2, SpnUGL; lane 3, SpyUGL. *B.* SagUGL crystal.
